# Supplementary material for: MoO2Cl2catalyzed efficient synthesis of functionalized 3,4-dihydropyrimidin-2(1H)-ones/thiones and polyhydroquinolines: recyclability, fluorescence and biological studies
Source: Royal Society of Chemistry journal article supplement (doi:10.1039/c5nj02444g), 2015-11-30
Supplement: c5nj02444g1.pdf [file c5nj02444g1.pdf]

## Supporting Information

### **MoO<sub>2</sub>Cl<sub>2</sub> catalyzed efficient synthesis of functionalized 3,4-dihydropyrimidin-2(1*H*)-ones/thiones and polyhydroquinolines: Recyclability, Fluorescence and Biological studies**

Sravanthi Devi Guggilapu,<sup>a</sup> Santosh Kumar Prajapati,<sup>a</sup> Atulya Nagarsenkar,<sup>a</sup> Guntaku Lalita,<sup>b</sup> Ganga Modi Naidu Vegi<sup>b</sup> and Bathini Nagendra Babu\*

<sup>a</sup> Department of Medicinal Chemistry, National Institute of Pharmaceutical Education and Research, Balanagar, Hyderabad, 500037, India Tel.: +91-40-23073740; fax: +91-40-23073751; e-mail: bathini@niperhyd.ac.in

<sup>b</sup> Department of Pharmacology and Toxicology, National Institute of Pharmaceutical Education and Research, Balanagar, Hyderabad, 500037, India

#### TABLE OF CONTENTS

| Contents                 | Page |
|--------------------------|------|
| Data of compounds        | 2    |
| NMR spectra of compounds | 4    |
| UPLC data of compound 4p | 13   |
| Cytotoxicity Assay       | 14   |

## Spectral data

*Methyl 4-(3-((tert-butyldimethylsilyl)oxy)phenyl)-6-methyl-2-oxo-1,2,3,4-tetrahydropyrimidine-5-carboxylate (4k)*: White solid, mp 178-181 °C; IR (KBr)  $\nu_{\max}$  3439, 3245, 3110, 1717, 1656, 1458, 1294, 1232, 1108, 787  $\text{cm}^{-1}$ ;  $^1\text{H}$  NMR (300 MHz, DMSO- $d_6$ )  $\delta$  9.22 (1H, s), 7.74 (1H, brs), 7.19 (1H, t,  $J = 8.2$  Hz), 6.87 (1H, d,  $J = 7.6$  Hz), 6.71 (2H, s), 5.10 (1H, d,  $J = 3.0$  Hz), 3.55 (3H, s), 2.24 (3H, s), 0.96 (9H, s), 0.14 (6H, s);  $^{13}\text{C}$  NMR (75 MHz, DMSO- $d_6$ ) 165.6, 155.0, 152.1, 148.5, 146.1, 129.5, 119.0, 118.5, 117.3, 98.9, 53.2, 50.6, 25.4, 17.6, -4.6; HRMS-ESI:  $m/z$   $[\text{M}+\text{H}]^+$  for calculated  $\text{C}_{19}\text{H}_{28}\text{N}_2\text{O}_4\text{Si}^+$   $[\text{M}+\text{H}]^+$ : 377.1891; found: 377.1887.

*Ethyl 4-(3-((tert-butyldiphenylsilyl)oxy)phenyl)-6-methyl-2-oxo-1,2,3,4-tetrahydropyrimidine-5-carboxylate (4l)*: White solid, mp 111-114 °C; IR (KBr)  $\nu_{\max}$  3450, 3347, 1698, 1688, 1626, 1458, 1220, 1150, 965, 831  $\text{cm}^{-1}$ ;  $^1\text{H}$  NMR (300 MHz, DMSO- $d_6$ )  $\delta$  9.10 (1H, s), 7.65 (5H, m), 7.48 (6H, m), 7.91 (1H, t,  $J = 7.8$  Hz), 6.82 (2H, m), 6.57 (1H, dd,  $J = 1.7$  Hz,  $J = 7.8$  Hz), 5.04 (1H, d,  $J = 3.2$  Hz), 3.89 (2H, m), 2.13 (3H, s), 1.01 (12H, m);  $^{13}\text{C}$  NMR (75 MHz, DMSO- $d_6$ ) 165.2, 157.3, 152.1, 147.9, 146.1, 136.2, 134.8, 134.3, 129.1, 129.0, 127.8, 127.3, 116.7, 114.0, 113.0, 99.3, 59.0, 53.7, 26.4, 18.5, 17.6, 14.0; HRMS-ESI:  $m/z$   $[\text{M}+\text{H}]^+$  for calculated  $\text{C}_{30}\text{H}_{34}\text{N}_2\text{O}_4\text{Si}^+$   $[\text{M}+\text{H}]^+$ : 515.2361; found: 515.2355.

*Methyl 4-(3,5-dimethyl-1-phenyl-1H-pyrazol-4-yl)-6-methyl-2-oxo-1,2,3,4-tetrahydropyrimidine-5-carboxylate (4m)*: Off white solid, mp 227-230 °C; IR (KBr)  $\nu_{\max}$  3322, 3244, 2949, 1700, 1684, 1651, 1430, 1334, 1242, 1089, 779  $\text{cm}^{-1}$ ;  $^1\text{H}$  NMR (300 MHz, DMSO- $d_6$ )  $\delta$  9.22 (1H, s), 7.53 (6H, m), 5.25 (1H, s), 3.50 (3H, s), 2.25 (6H, s), 2.14 (3H, s);  $^{13}\text{C}$  NMR (75 MHz, DMSO- $d_6$ ) 165.8, 151.1, 147.0, 146.4, 139.3, 136.3, 128.9, 127.0, 124.3, 121.4, 96.5, 50.6, 46.2, 17.5, 11.9, 10.3; HRMS  $m/z$  calcd for  $\text{C}_{18}\text{H}_{20}\text{N}_4\text{O}_3^+$   $[\text{M}+\text{H}]^+$ : 341.1608; found: 341.1605.

*Ethyl 6-methyl-2-oxo-4-(4-phenylthiophen-2-yl)-1,2,3,4-tetrahydropyrimidine-5-carboxylate (4n)*: Off white solid, mp 192-195 °C; IR (KBr)  $\nu_{\max}$  3237, 3129, 2974, 1702, 1651, 1452, 1321, 1295, 1236, 1094, 795, 734  $\text{cm}^{-1}$ ;  $^1\text{H}$  NMR (300 MHz, DMSO- $d_6$ )  $\delta$  9.36 (1H, s), 7.93 (1H, d,  $J = 2.2$  Hz), 7.64 (1H, s), 7.62 (2H, d,  $J = 7.7$  Hz), 7.45 (2H, t,  $J = 7.6$  Hz), 7.24 (2H, m), 5.47 (1H, d,  $J = 2.0$  Hz), 4.20 (2H, q,  $J = 6.8$  Hz), 2.27 (3H, s), 1.27 (3H, t,  $J = 6.7$  Hz);  $^{13}\text{C}$  NMR (75 MHz, DMSO- $d_6$ ) 164.9, 152.1, 149.9, 148.8, 140.5, 135.0, 128.8, 127.0, 125.6, 122.2, 119.6, 99.3, 59.3, 49.5, 17.6, 14.1; HRMS-ESI:  $m/z$   $[\text{M}+\text{H}]^+$  for calculated  $\text{C}_{18}\text{H}_{18}\text{N}_2\text{O}_3\text{S}^+$   $[\text{M}+\text{H}]^+$ : 343.1111; found: 343.1107.

*Methyl 4-(7-hydroxy-4-methyl-2-oxo-2H-chromen-5-yl)-6-methyl-2-oxo-1,2,3,4-tetrahydropyrimidine-5-carboxylate (4o)*: Off white solid, mp 249-252 °C; IR (KBr)  $\nu_{\max}$  3382, 2954, 1741, 1684, 1603, 1447, 1212, 1075, 853  $\text{cm}^{-1}$ ;  $^1\text{H}$  NMR (300 MHz, DMSO- $d_6$ )  $\delta$  7.77 (1H, s), 7.62 (2H, m), 6.82 (1H, d,  $J = 8.6$  Hz), 6.27 (1H, s), 4.98 (1H, dd,  $J = 2.7$  Hz,  $J = 5.0$  Hz), 3.72 (3H, s), 2.34 (3H, s), 1.76 (3H, s);  $^{13}\text{C}$  NMR (75 MHz, DMSO- $d_6$ ) 165.5, 160.0, 159.6, 153.6, 151.6, 151.7, 148.9, 124.7, 117.6, 112.5, 111.4, 109.7, 94.4, 50.1, 45.3, 18.2, 17.7; HRMS  $m/z$  calcd for  $\text{C}_{17}\text{H}_{16}\text{N}_2\text{O}_6^+$   $[\text{M}+\text{H}]^+$ : 345.1081; found: 345.1080.

Ethyl 4-(4-(*tert*-butyldimethylsilyloxy)phenyl)-2-methyl-5-oxo-1,4,5,6,7,8-hexahydroquinoline-3-carboxylate (**7g**): White solid; M.P: 211-214 °C, IR (KBr)  $\nu_{\max}$  3287, 2948, 2859, 1697, 1646, 1505, 1477, 1380, 1222, 1181, 1072, 916, 774  $\text{cm}^{-1}$ ;  $^1\text{H}$  NMR (500 MHz,  $\text{CDCl}_3$ )  $\delta$  7.11 (2H, d,  $J$  = 8.3 Hz, ArH), 6.65 (2H, d,  $J$  = 8.3 Hz, ArH), 5.01 (1H, s), 4.15 (2H, q,  $J$  = 7.1 Hz), 3.01 (1H, m), 2.46 (2H, m), 2.39 (3H, s), 2.32 (1H, m), 1.23 (2H, m), 1.16 (3H, t,  $J$  = 7.1 Hz), 0.94 (9H, s), 0.15 (6H, s);  $^{13}\text{C}$  NMR (125 MHz,  $\text{CDCl}_3$ ) 195.7, 167.4, 153.6, 149.1, 142.8, 140.0, 128.8, 119.2, 113.7, 106.3, 59.7, 37.0, 35.4, 29.6, 27.5, 25.6, 21.0, 19.3, 18.1, 14.1, -4.4; HRMS-ESI:  $m/z$   $[\text{M}+\text{H}]^+$  for calculated  $\text{C}_{25}\text{H}_{35}\text{NO}_4\text{Si}$ : 442.2408; observed: 442.2415.

Methyl 4-(4-(*tert*-butyldimethylsilyloxy)phenyl)-2,7,7-trimethyl-5-oxo-1,4,5,6,7,8-hexahydroquinoline-3-carboxylate (**7j**): White solid; M.P: 223-226 °C, IR (KBr)  $\nu_{\max}$  3488, 2953, 2917, 1698, 1647, 1506, 1380, 1270, 1076, 915, 775  $\text{cm}^{-1}$ ;  $^1\text{H}$  NMR (500 MHz,  $\text{CDCl}_3$ )  $\delta$  7.11 (2H, d,  $J$  = 8.5 Hz, ArH), 6.65 (2H, d,  $J$  = 8.5 Hz, ArH), 5.67 (1H, brs.), 5.00 (1H, s), 3.60 (3H, s), 2.39 (3H, s), 2.33 (1H, m), 2.19 (3H, m), 1.07 (3H, s), 0.94 (9H, s), 0.91 (3H, s), 0.14 (6H, s);  $^{13}\text{C}$  NMR (125 MHz,  $\text{CDCl}_3$ ) 195.4, 167.9, 153.6, 147.4, 143.3, 139.6, 128.6, 119.3, 112.5, 105.9, 50.9, 50.7, 41.1, 35.3, 32.7, 29.6, 29.4, 26.9, 25.6, 19.4, 18.1, -4.4; HRMS-ESI:  $m/z$   $[\text{M}+\text{H}]^+$  for calculated  $\text{C}_{26}\text{H}_{37}\text{NO}_4\text{Si}$ : 456.2565; observed: 456.2572.

Ethyl 4-(3-((1-benzyl-1H-1,2,3-triazol-5-yl)methoxy)phenyl)-2,7,7-trimethyl-5-oxo-1,4,5,6,7,8-hexahydroquinoline-3-carboxylate (**7q**): Yellow solid; M.P: 56-59 °C, IR (KBr)  $\nu_{\max}$  3487, 3070, 2957, 1685, 1484, 1378, 1212, 1169, 1028, 772, 718  $\text{cm}^{-1}$ ;  $^1\text{H}$  NMR (500 MHz,  $\text{CDCl}_3$ )  $\delta$  7.65 (1H, s, ArH), 7.48 (3H, m, ArH), 7.37 (2H, m, ArH), 7.17 (1H, t,  $J$  = 7.9 Hz, ArH), 7.02 (1H, d,  $J$  = 7.5 Hz, ArH), 6.98 (1H, s, ArH), 6.77 (1H, d,  $J$  = 8.0 Hz, ArH), 6.12 (1H, brs.), 5.59 (2H, s), 5.21 (2H, d,  $J$  = 2.2 Hz), 5.10 (1H, s), 4.12 (2H, t,  $J$  = 7.0 Hz), 2.43 (3H, s), 2.34 (2H, m), 2.24 (2H, m), 1.26 (3H, t,  $J$  = 7.1 Hz), 1.14 (3H, s), 0.99 (3H, s);  $^{13}\text{C}$  NMR (125 MHz,  $\text{CDCl}_3$ ) 195.6, 167.4, 157.9, 148.6, 144.7, 143.6, 134.4, 129.0, 128.7, 128.0, 122.9, 121.2, 114.1, 112.5, 111.8, 105.7, 61.7, 59.7, 54.1, 50.6, 40.9, 36.5, 32.6, 29.2, 27.2, 20.7, 19.2, 14.2; HRMS-ESI:  $m/z$   $[\text{M}+\text{H}]^+$  for calculated  $\text{C}_{31}\text{H}_{34}\text{N}_4\text{O}_4$ : 527.2653; observed: 527.2658.

Ethyl 2,7,7-trimethyl-5-oxo-4-(1-(2-(piperidin-1-yl)acetyl)-*1H*-indol-3-yl)-1,4,5,6,7,8-hexahydroquinoline-3-carboxylate (**7s**): White solid, M.P: 171-173 °C, IR (KBr)  $\nu_{\max}$  3429, 2936, 1648, 1467, 1380, 1215, 1188, 1107, 1016, 1113, 801, 739  $\text{cm}^{-1}$ ;  $^1\text{H}$  NMR (500 MHz,  $\text{CDCl}_3$ )  $\delta$  8.92 (1H, brs.), 7.62 (1H, d,  $J$  = 7.9 Hz, ArH), 7.30 (1H, m, ArH), 7.20 (1H, t,  $J$  = 7.5 Hz, ArH), 7.12 (2H, m, ArH), 6.55 (1H, d,  $J$  = 2.8 Hz), 4.91 (2H, s), 4.42 (2H, q,  $J$  = 7.1 Hz), 3.59 (2H, m), 3.42 (2H, m), 3.28 (2H, s), 3.07 (3H, s), 2.60 (2H, s), 1.64 (2H, m), 1.57 (2H, m), 1.45 (5H, m), 1.14 (6H, s);  $^{13}\text{C}$  NMR (125 MHz,  $\text{CDCl}_3$ ) 196.3, 165.5, 164.0, 163.5, 138.1, 136.4, 128.5, 128.2, 125.3, 125.0, 121.9, 121.0, 119.6, 108.9, 102.2, 61.7, 51.7, 48.2, 46.3, 45.3, 43.3, 32.9, 29.6, 28.1, 26.2, 25.4, 24.2, 14.2; HRMS-ESI:  $m/z$   $[\text{M}+\text{H}]^+$  for calculated  $\text{C}_{30}\text{H}_{37}\text{N}_3\text{O}_4$  504.2857; observed: 504.2861.

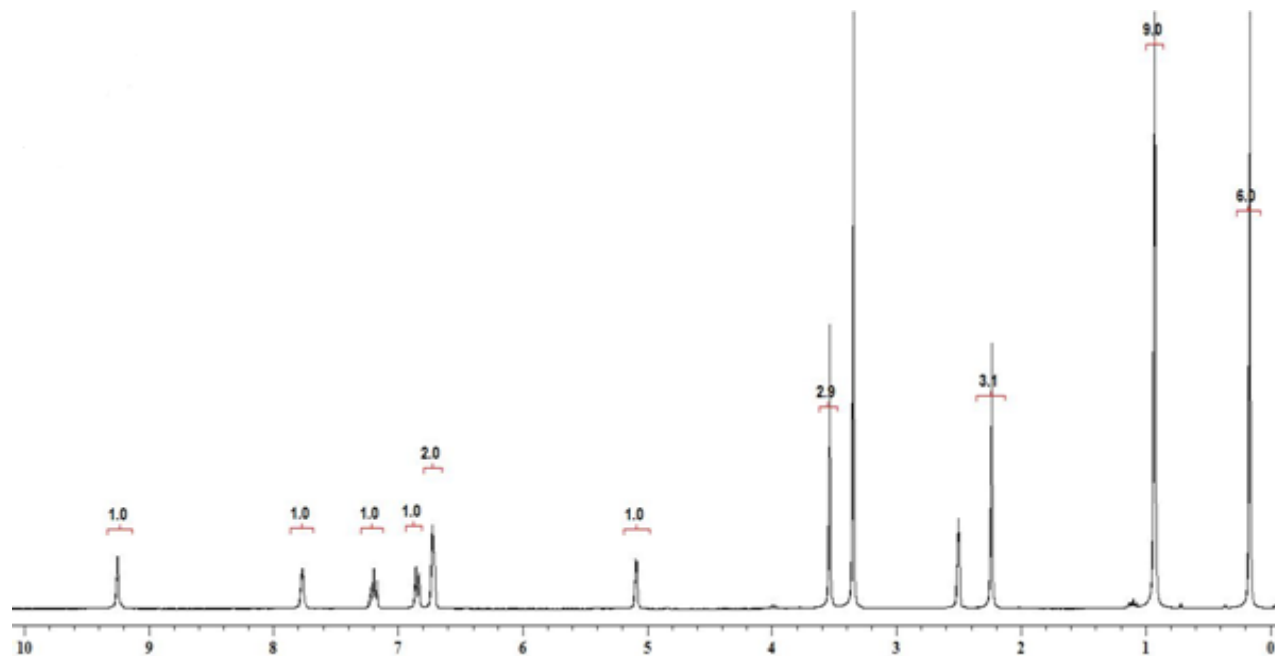

<sup>1</sup>H NMR Spectrum of methyl 4-(3-((tert-butyldimethylsilyl)oxy)phenyl)-6-methyl-2-oxo-1,2,3,4-tetrahydropyrimidine-5-carboxylate (4k)

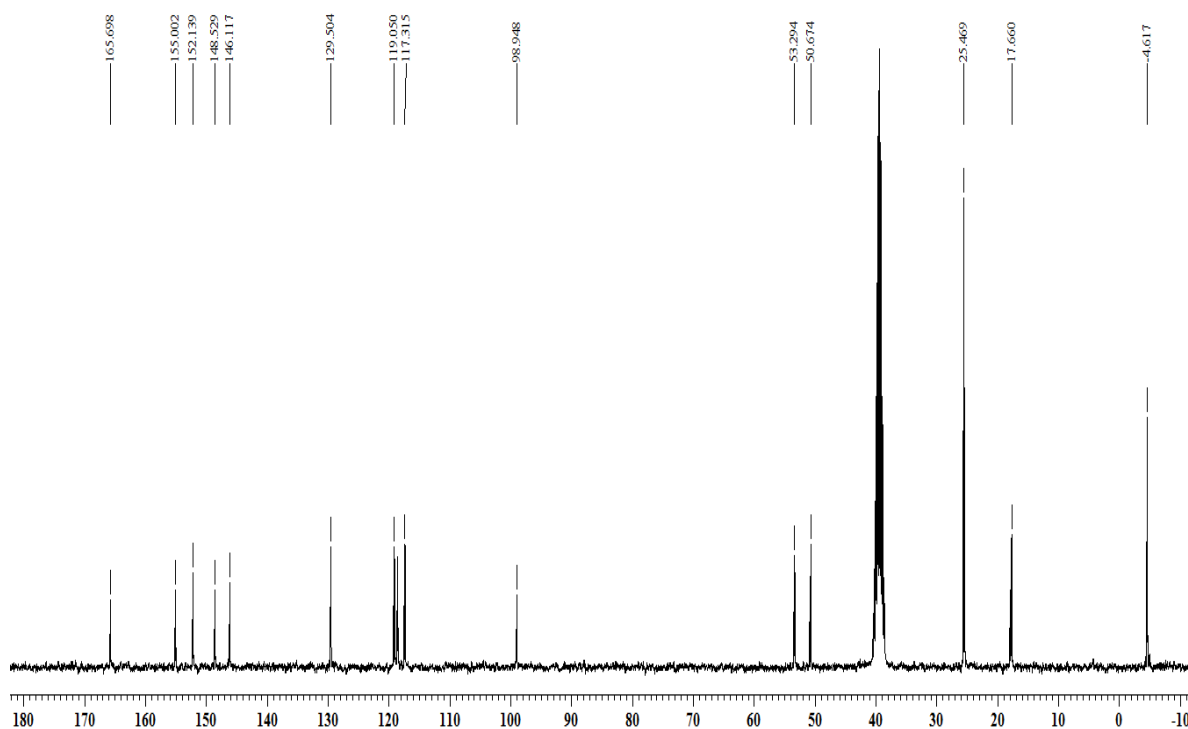

<sup>13</sup>C NMR Spectrum of methyl 4-(3-((tert-butyldimethylsilyl)oxy)phenyl)-6-methyl-2-oxo-1,2,3,4-tetrahydropyrimidine-5-carboxylate (4k).

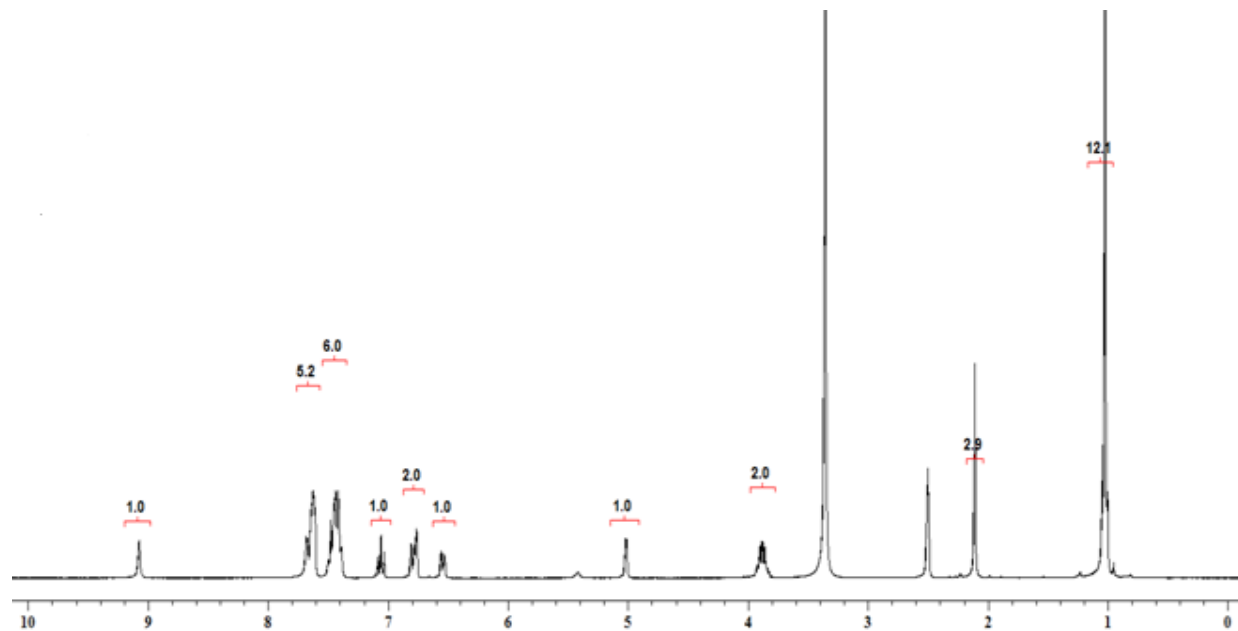

<sup>1</sup>H NMR Spectrum of ethyl 4-(3-((tert-butyldiphenylsilyl)oxy)phenyl)-6-methyl-2-oxo-1,2,3,4-tetrahydropyrimidine-5-carboxylate (4l)

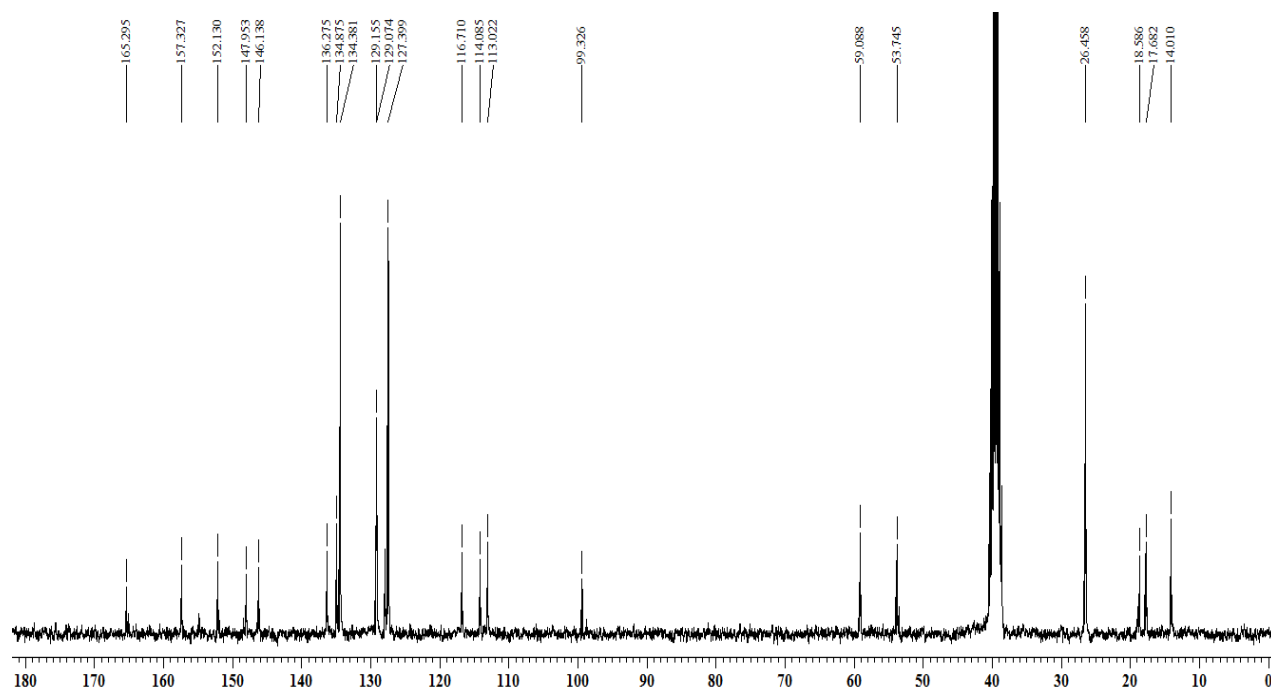

<sup>13</sup>C NMR Spectrum of ethyl 4-(3-((tert-butyldiphenylsilyl)oxy)phenyl)-6-methyl-2-oxo-1,2,3,4-tetrahydropyrimidine-5-carboxylate (4l)

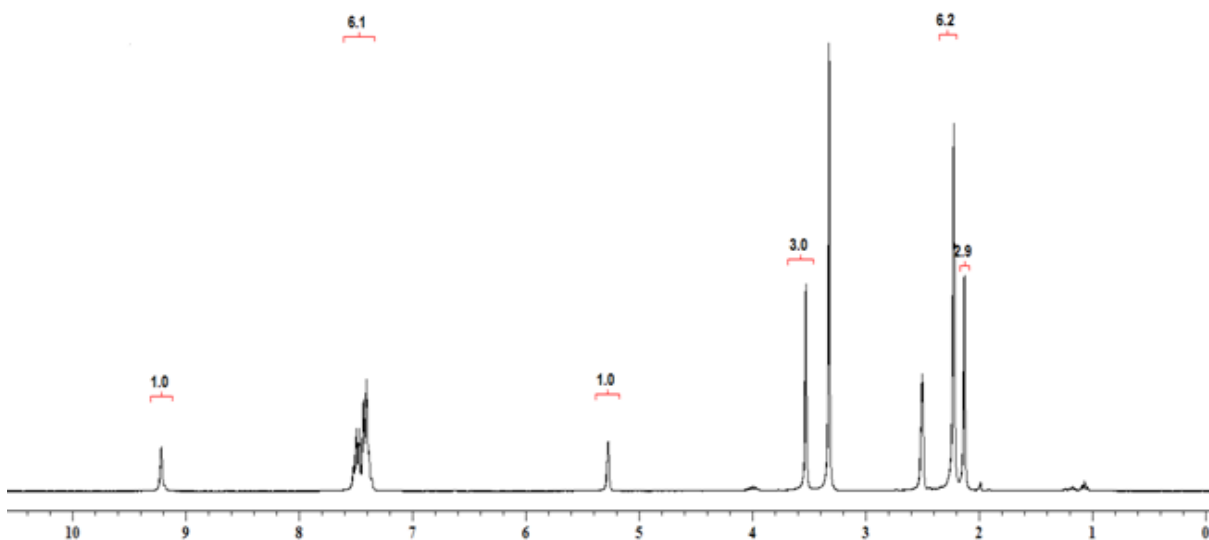

**<sup>1</sup>H NMR spectrum of methyl 4-(3,5-dimethyl-1-phenyl-1H-pyrazol-4-yl)-6-methyl-2-oxo-1,2,3,4-tetrahydropyrimidine-5-carboxylate (4m)**

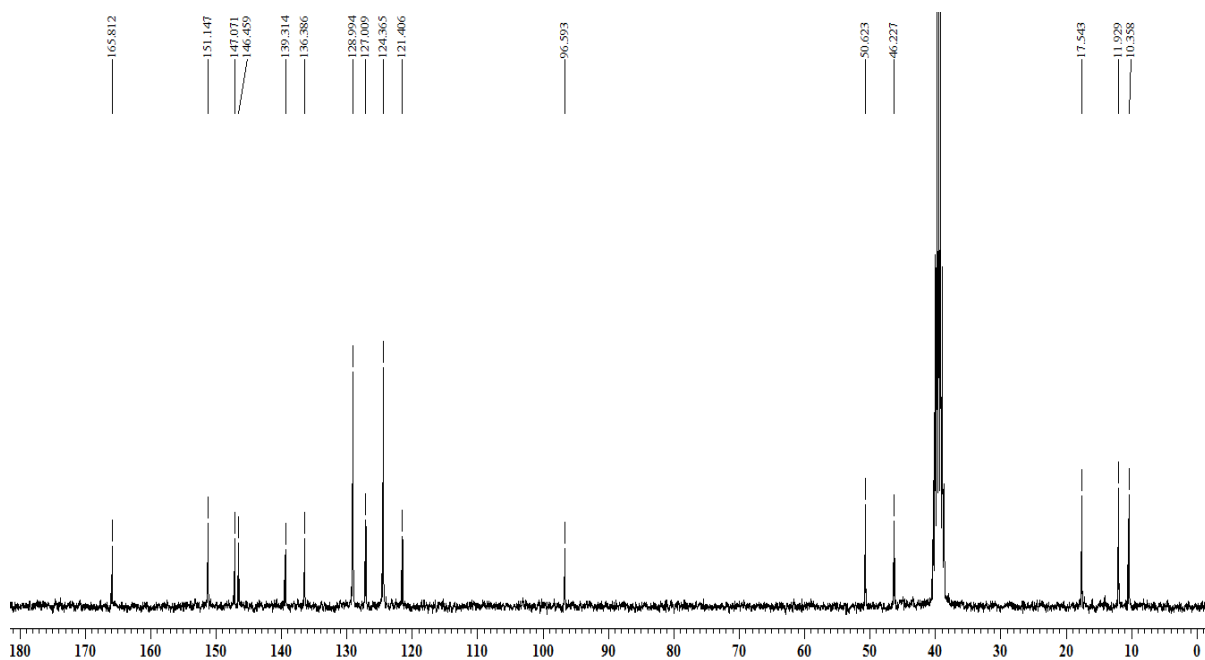

**<sup>13</sup>C NMR spectrum of methyl 4-(3,5-dimethyl-1-phenyl-1H-pyrazol-4-yl)-6-methyl-2-oxo-1,2,3,4-tetrahydropyrimidine-5-carboxylate (4m)**

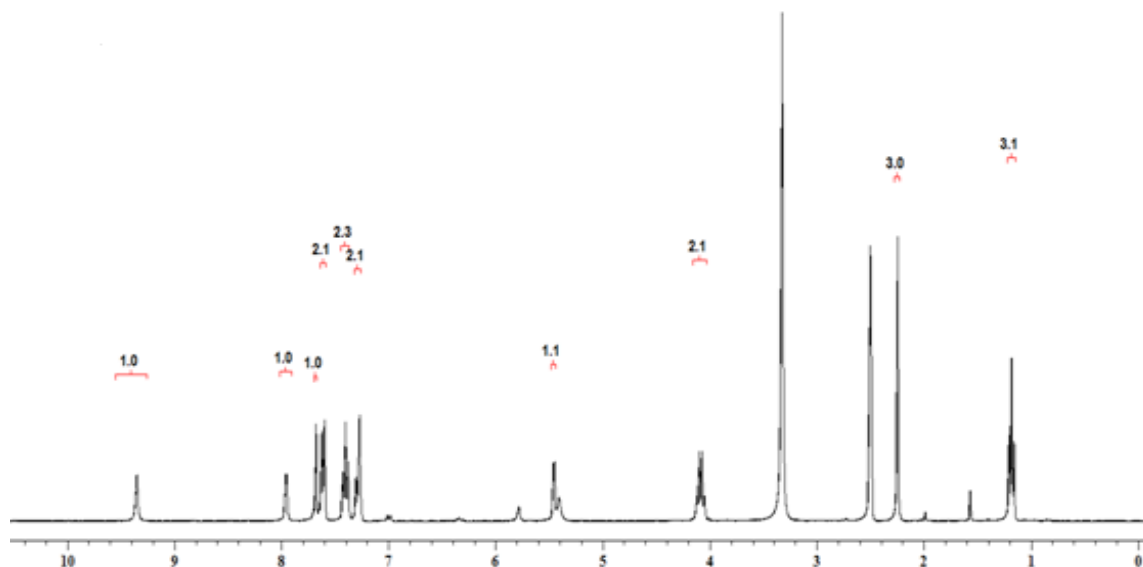

<sup>1</sup>H NMR spectrum of ethyl 6-methyl-2-oxo-4-(4-phenylthiophen-2-yl)-1,2,3,4-tetrahydropyrimidine-5-carboxylate (4n)

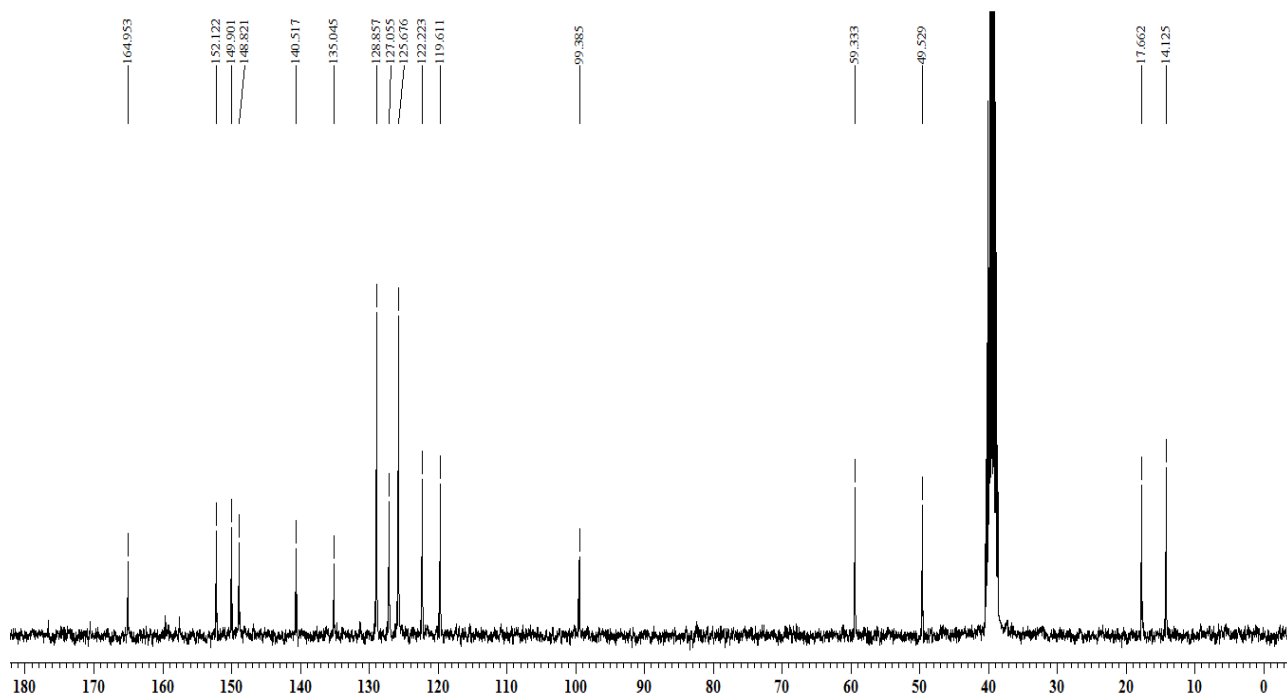

<sup>13</sup>C NMR spectrum of ethyl 6-methyl-2-oxo-4-(4-phenylthiophen-2-yl)-1,2,3,4-tetrahydropyrimidine-5-carboxylate (4n)

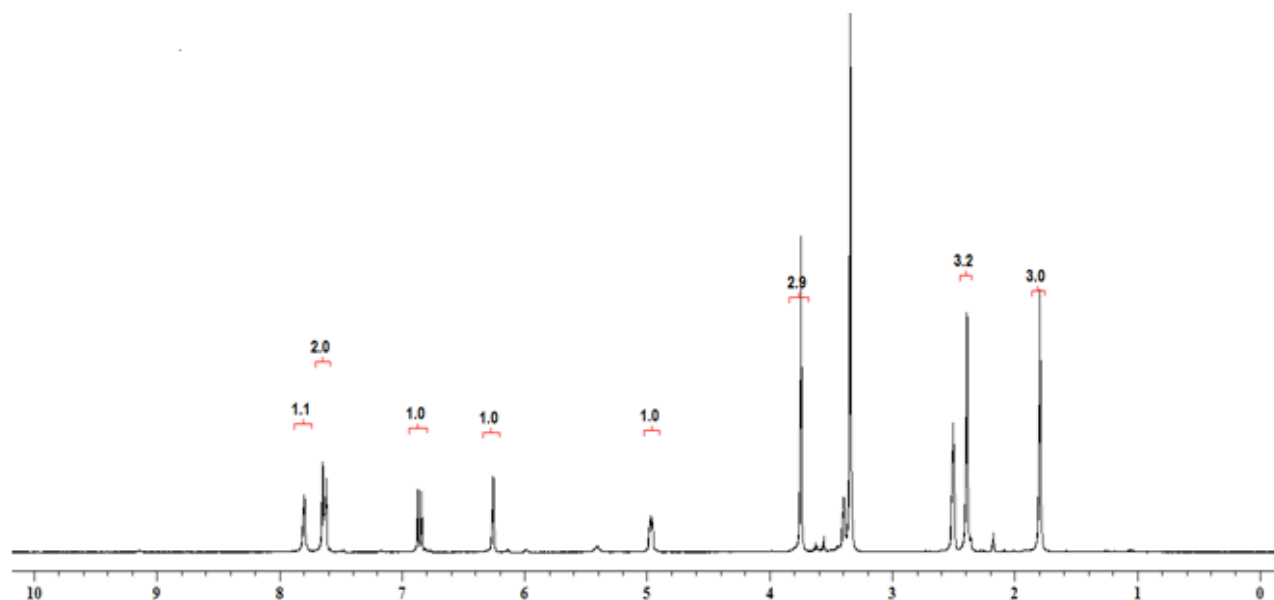

<sup>1</sup>H NMR spectrum of methyl 4-(7-hydroxy-4-methyl-2-oxo-2H-chromen-5-yl)-6-methyl-2-oxo-1,2,3,4-tetrahydropyrimidine-5-carboxylate (4o).

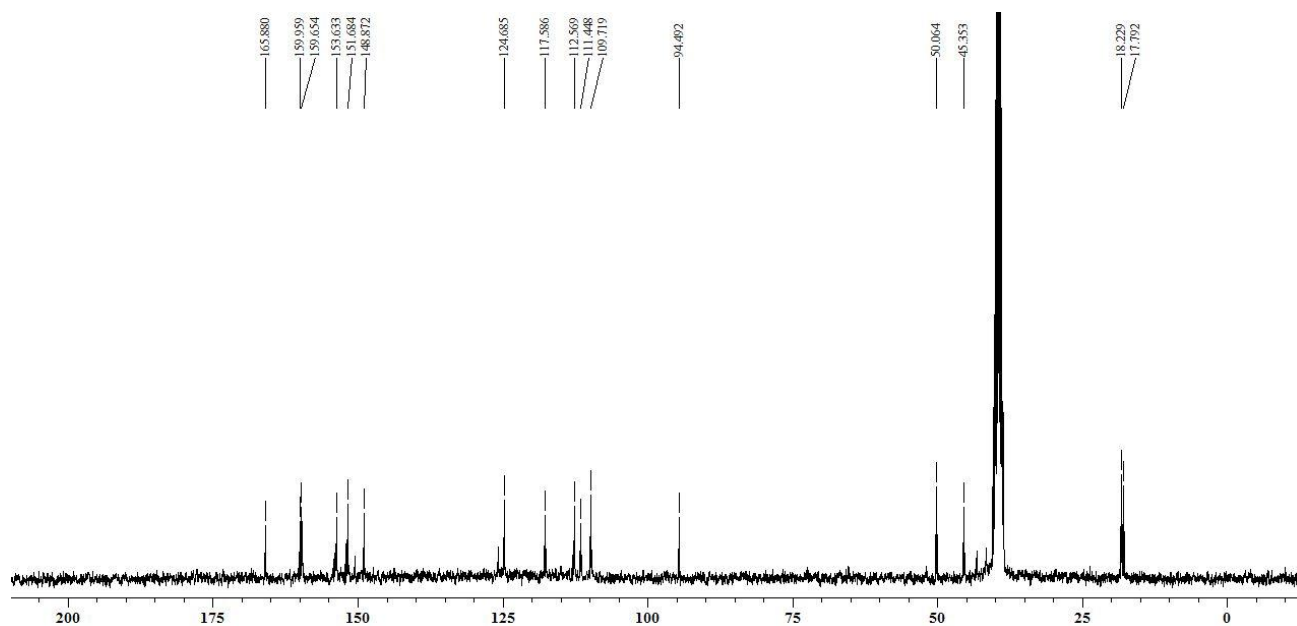

<sup>13</sup>C NMR spectrum of methyl 4-(7-hydroxy-4-methyl-2-oxo-2H-chromen-6-yl)-6-methyl-2-oxo-1,2,3,4-tetrahydropyrimidine-5-carboxylate (4o).

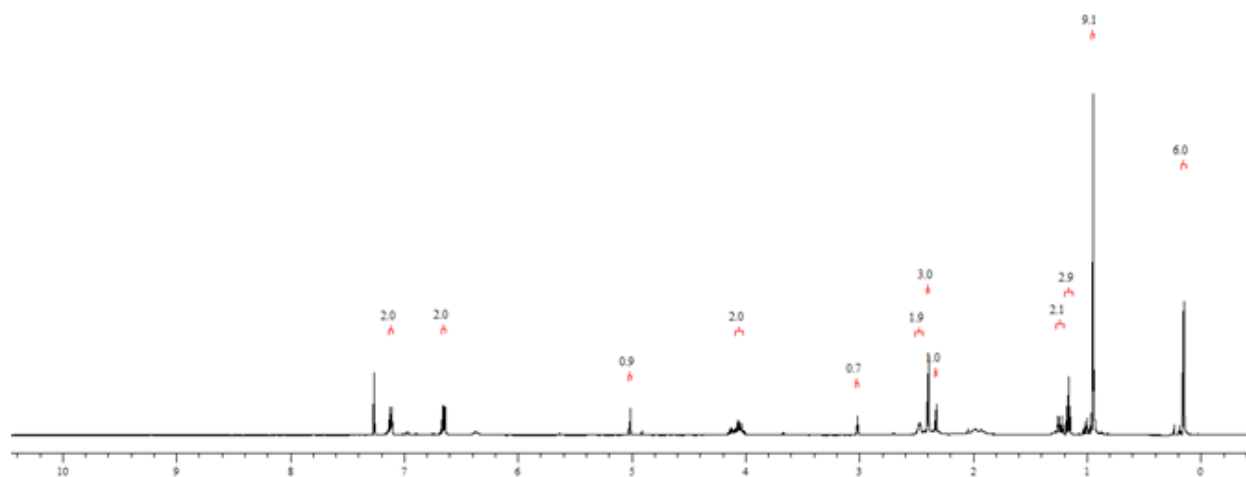

**<sup>1</sup>H NMR spectrum of ethyl 4-(4-(*tert*-butyldimethylsilyloxy) phenyl)-2-methyl-5-oxo-1,4,5,6,7,8-hexahydroquinoline-3-carboxylate (7g).**

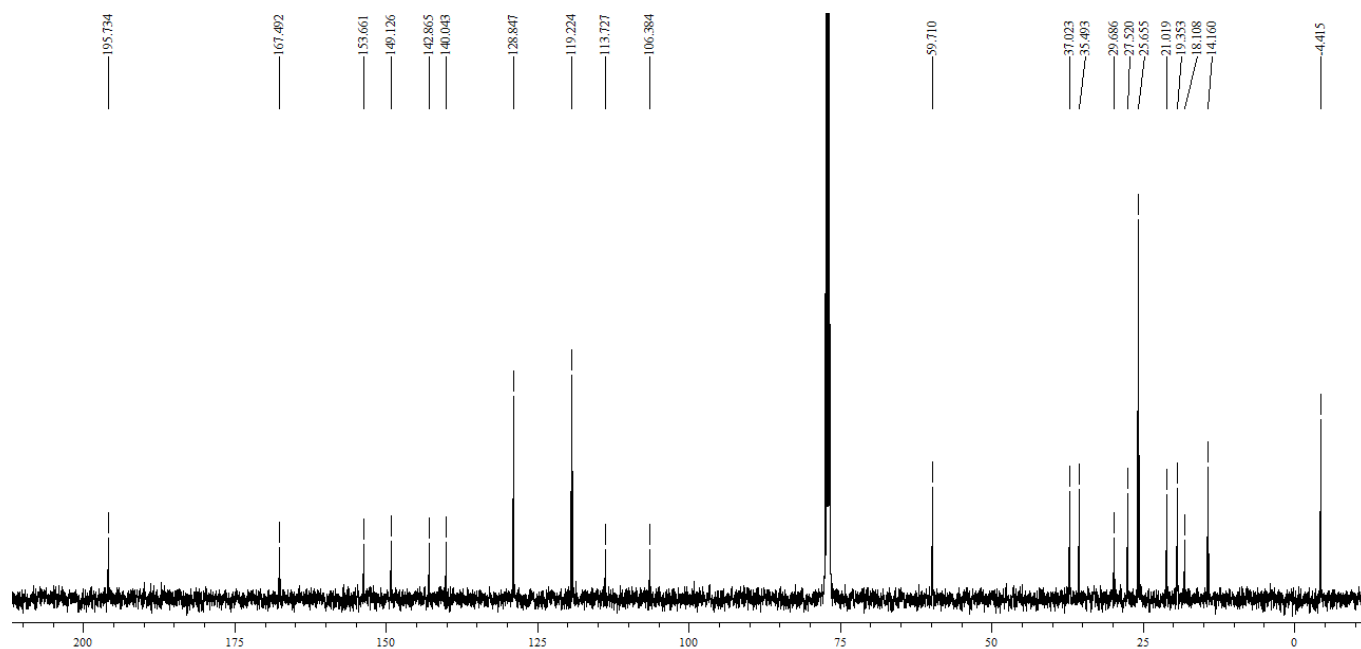

**<sup>13</sup>C NMR spectrum of ethyl 4-(4-(*tert*-butyldimethylsilyloxy) phenyl)-2-methyl-5-oxo-1,4,5,6,7,8-hexahydroquinoline-3-carboxylate (7g).**

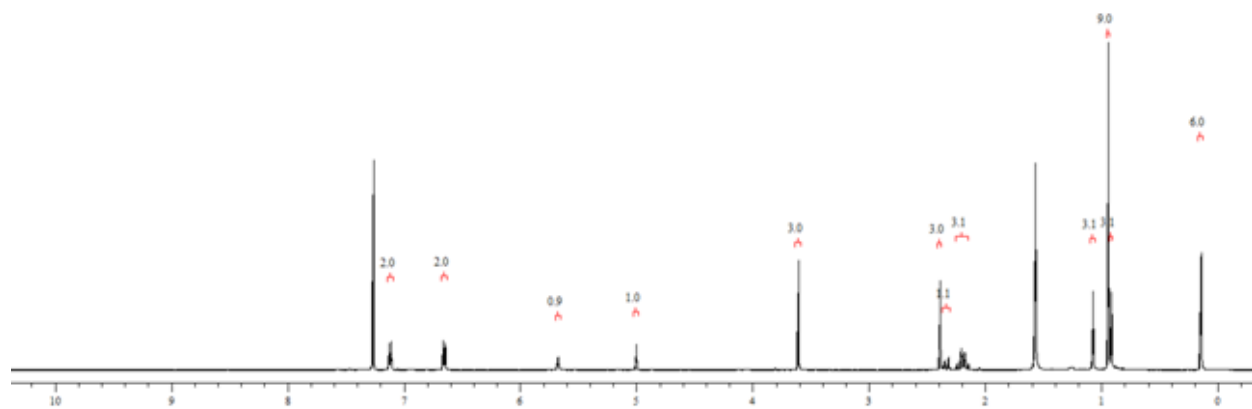

<sup>1</sup>H NMR spectrum of methyl 4-(4-(*tert*-butyldimethylsilyloxy)phenyl)-2,7,7-trimethyl-5-oxo-1,4,5,6,7,8-hexahydroquinoline-3-carboxylate (7j).

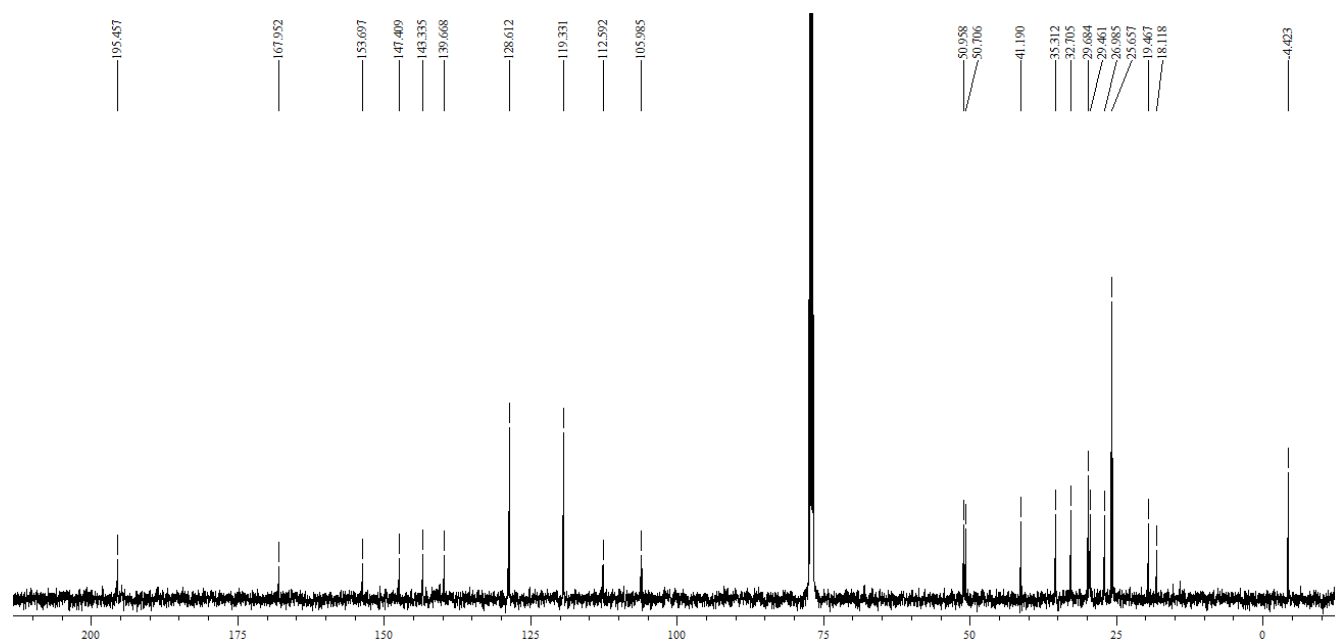

<sup>13</sup>C NMR spectrum of methyl 4-(4-(*tert*-butyldimethylsilyloxy)phenyl)-2,7,7-trimethyl-5-oxo-1,4,5,6,7,8-hexahydroquinoline-3-carboxylate (7j).

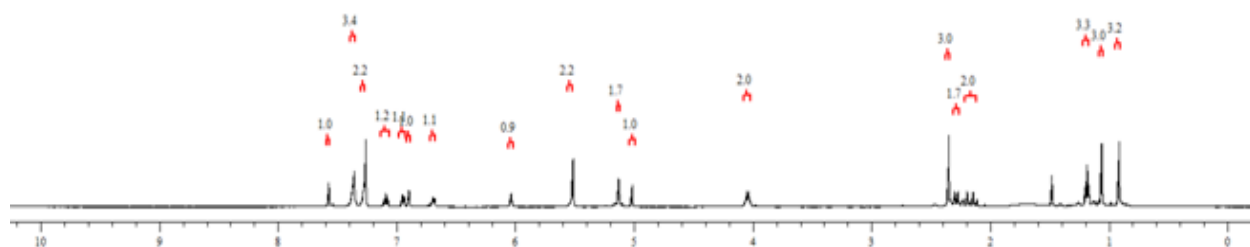

<sup>1</sup>H NMR spectrum of ethyl 4-(3-((1-benzyl-1H-1,2,3-triazol-5-yl)methoxy)phenyl)-2,7,7-trimethyl-5-oxo-1,4,5,6,7,8-hexahydroquinoline-3-carboxylate (7q).

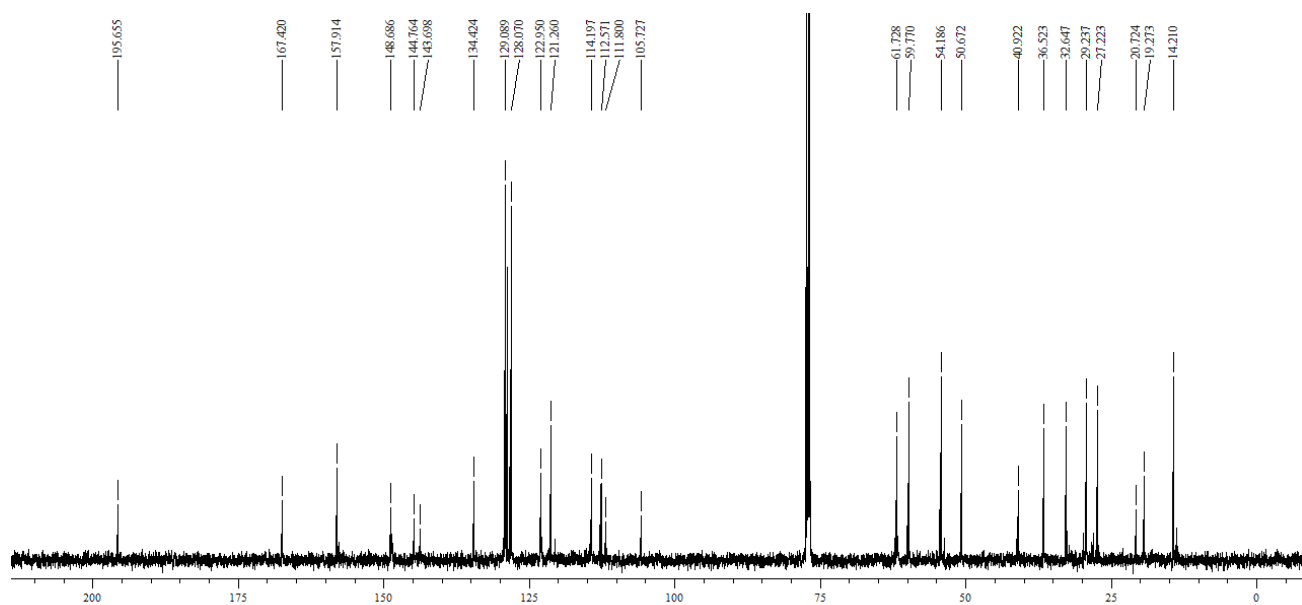

<sup>13</sup>C NMR spectrum of ethyl 4-(3-((1-benzyl-1H-1,2,3-triazol-5-yl)methoxy)phenyl)-2,7,7-trimethyl-5-oxo-1,4,5,6,7,8-hexahydroquinoline-3-carboxylate (7q).

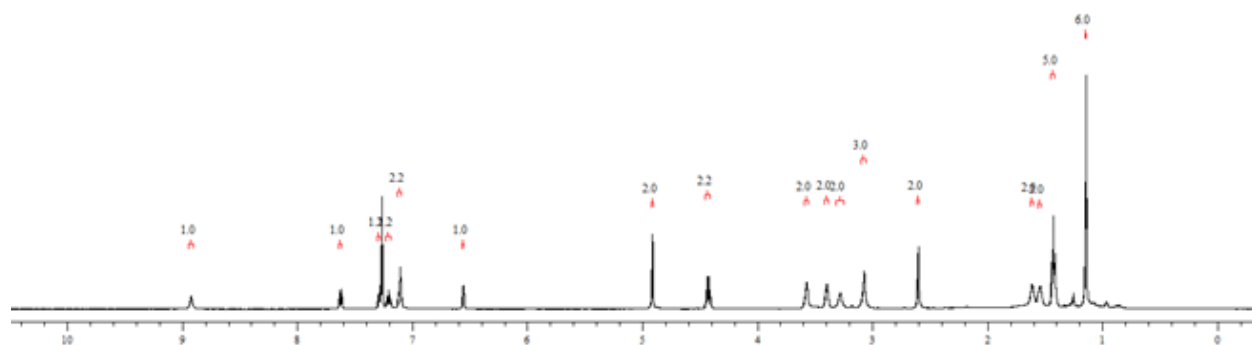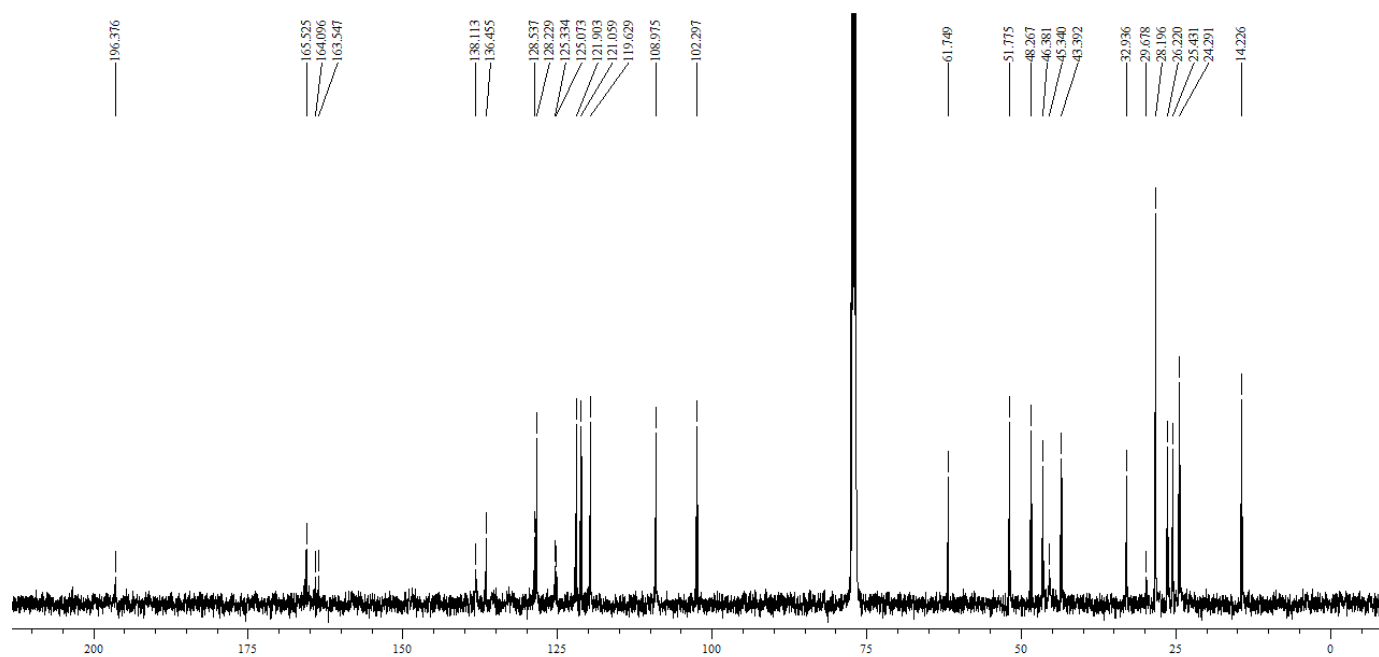

UPLC data of compound **4p**:

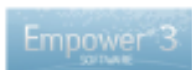

CHEM

### SAMPLE INFORMATION

|                   |                         |                     |                          |
|-------------------|-------------------------|---------------------|--------------------------|
| Sample Name:      | GS DH_T2                | Acquired By:        | System                   |
| Sample Type:      | Unknown                 | Sample Set Name     | 20150902B                |
| Vial:             | 17                      | Acq. Method Set:    | GS                       |
| Injection #:      | 1                       | Processing Method   | RIN                      |
| Injection Volume: | 10.00 ul                | Channel Name:       | 237.0nm@2                |
| Run Time:         | 6.0 Minutes             | Proc. Chnl. Descr.: | PDA 237.0 nm (190-400)nm |
| Date Acquired:    | 9/2/2015 4:56:13 PM IST |                     |                          |
| Date Processed:   | 9/3/2015 3:31:18 PM IST |                     |                          |

Auto-Scaled Chromatogram

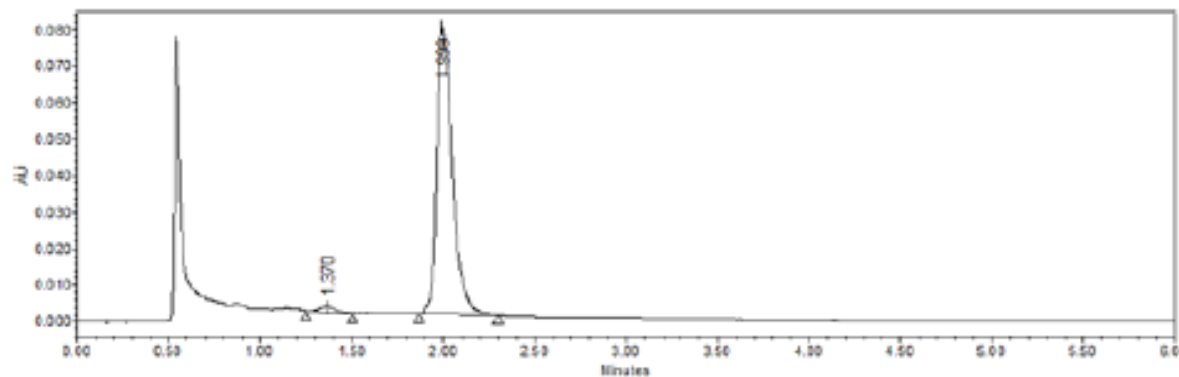

### Peak Results

|   | Name | RT    | Height | % Area | Area<br>( $\mu\text{V} \cdot \text{sec}$ ) |
|---|------|-------|--------|--------|--------------------------------------------|
| 1 |      | 1.370 | 1479   | 2.01   | 8990                                       |
| 2 |      | 1.999 | 78402  | 97.99  | 438802                                     |

### **Cytotoxicity assay:**

MTT assay is a standard colorimetric assay for measuring cellular proliferation. MTT is a tetrazolium salt, which is yellow in color and is photosensitive. MTT [3-(4, 5- dimethylthiazol-2-yl)-2, 5-diphenyl tetrazolium bromide] is taken by the living cells and reduced by a mitochondrial dehydrogenase enzyme to a purple formazan product that is impermeable to the cell membrane. Solubilisation with solvents like DMSO leads to liberation of product and amount of purple formazan product is directly related to the cell viability. 1x10<sup>4</sup> Cells (counted by Trypan blue exclusion dye method)) in 96- well plates were incubated with series of concentrations of compounds for 48 h at 37 °C in DMEM with 10% FBS medium. Then the above media was replaced with 90µl of fresh serum free media and 10 µl of MTT reagent (5mg/ml) and plates were incubated at 37 °C for 4h, there after the above media was replaced with 200µl of DMSO and incubated at 37 °C for 10min. The absorbance at 570 nm was measured on a spectrophotometer (spectra max, Molecular devices). IC<sub>50</sub> values were determined from plot: % cell viability (from control) versus concentration.
